# Supplementary material for: Putative Biosynthesis of Talarodioxadione & Talarooxime from Talaromyces stipitatus
Source: MDPI journal article supplement (doi:10.3390/molecules27144473), 2022-07-13
Supplement: s1 [file s1]

## Isolation of Talarodioxadione & Talarooxime from *Talaromyces stipitatus*

**Ahmed J. al Fahad<sup>1</sup>**

## Supplementary Information

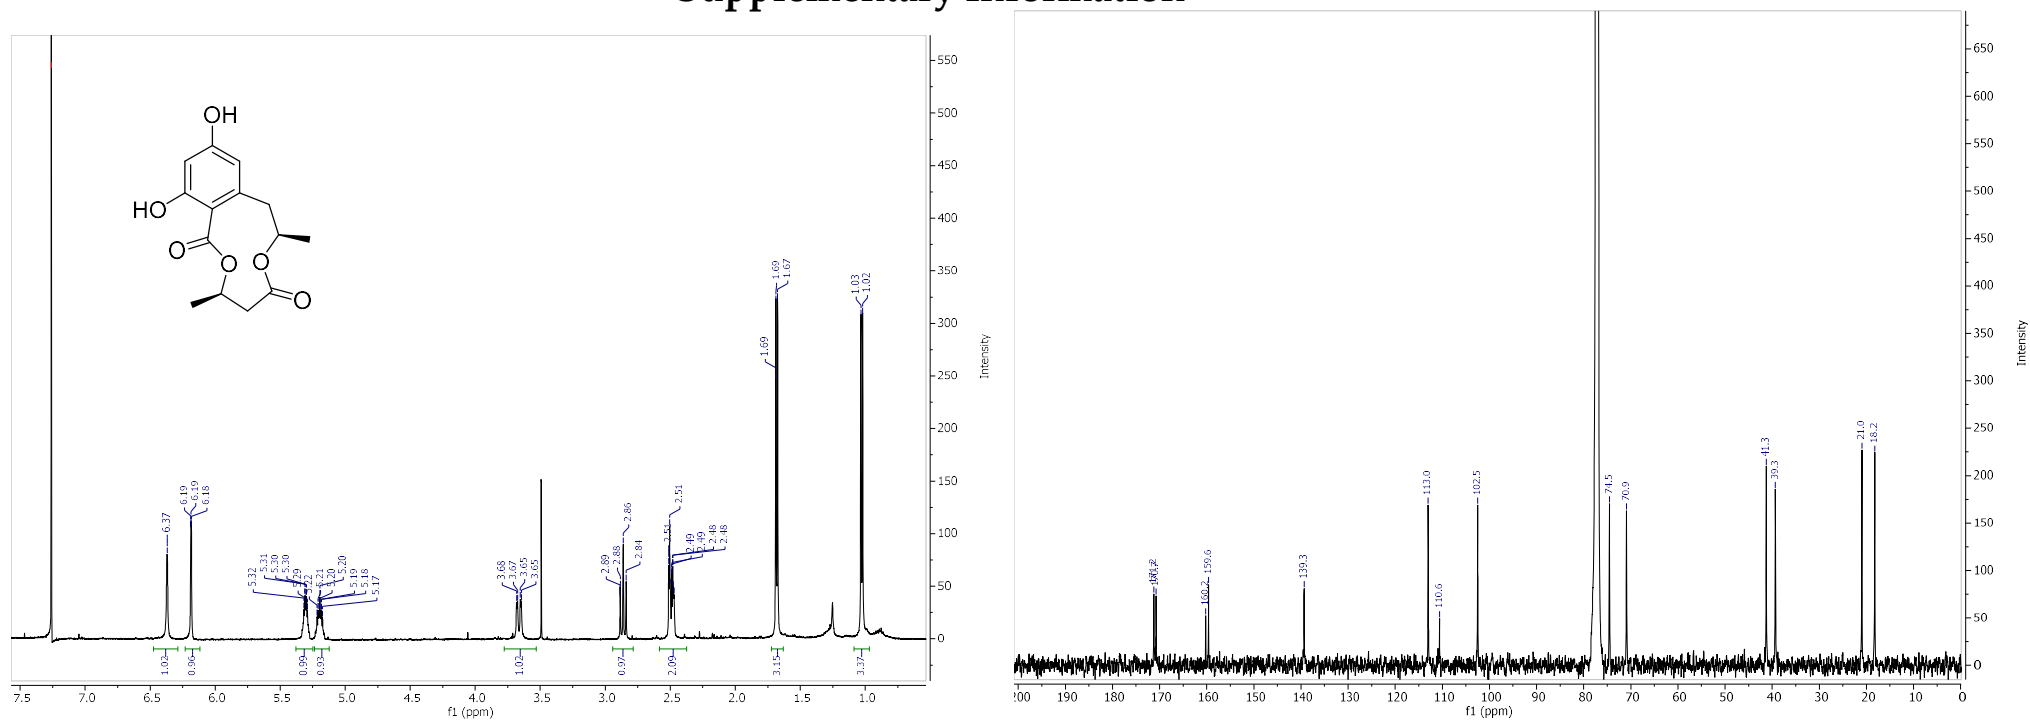

**Figure S1.**  $^1\text{H}$ -NMR and  $^{13}\text{C}$ -NMR spectra of Talarodioxadione **1** ( $\text{CDCl}_3$ , 600 and 150 MHz).

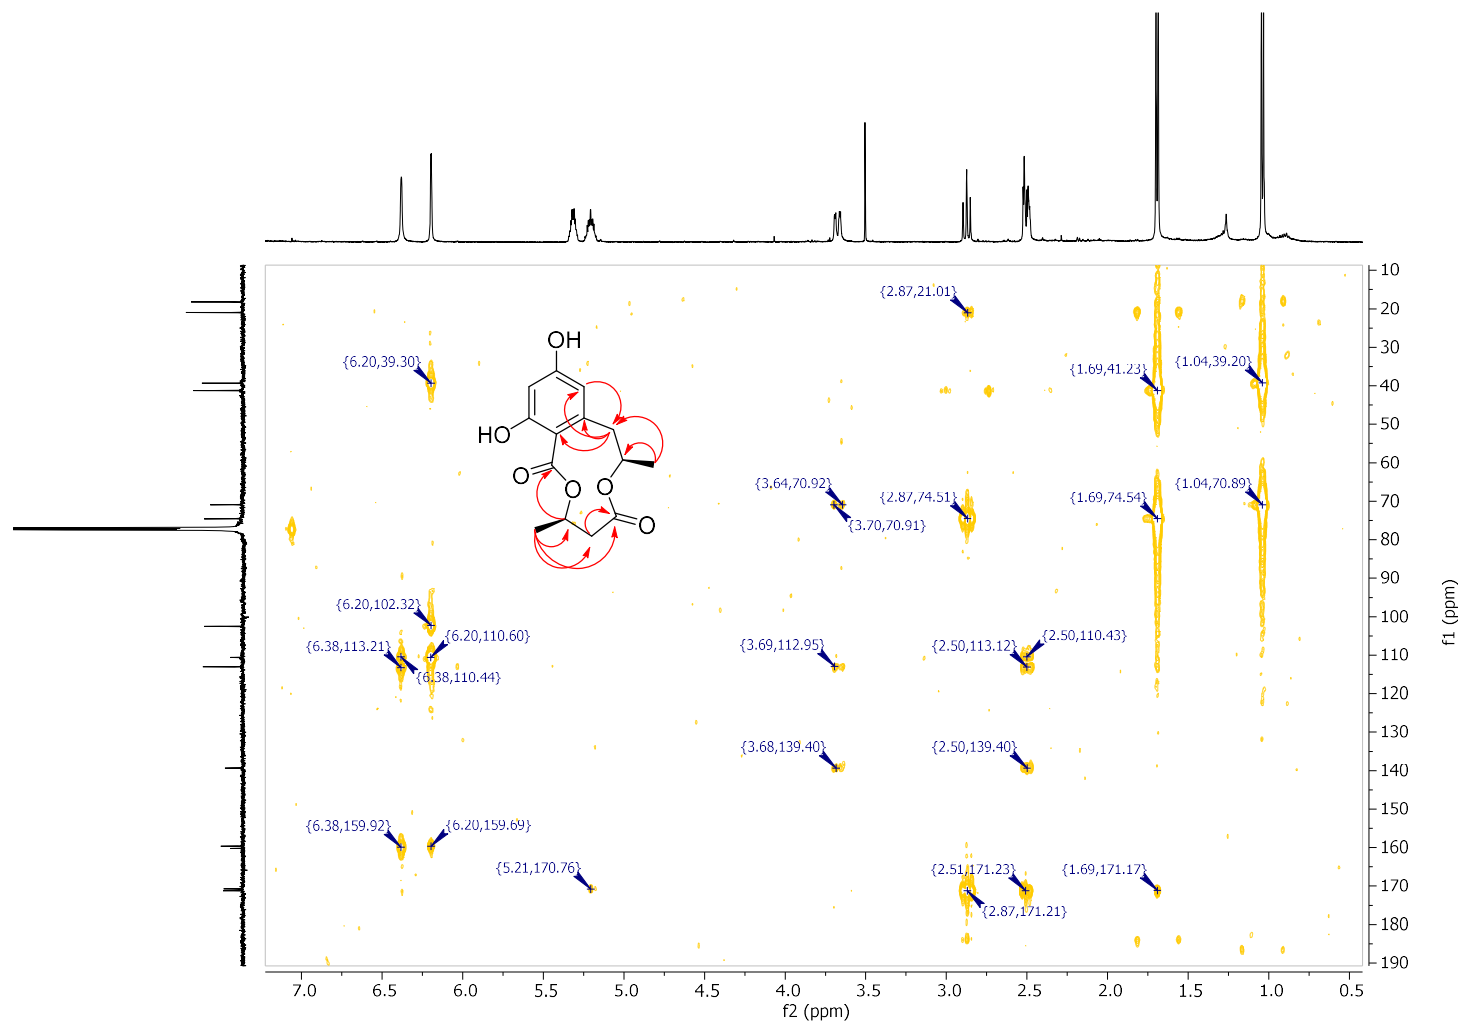

**Figure S2.** HMBC spectrum of Talarodioxadione **1** (CDCl<sub>3</sub>, 600 MHz).

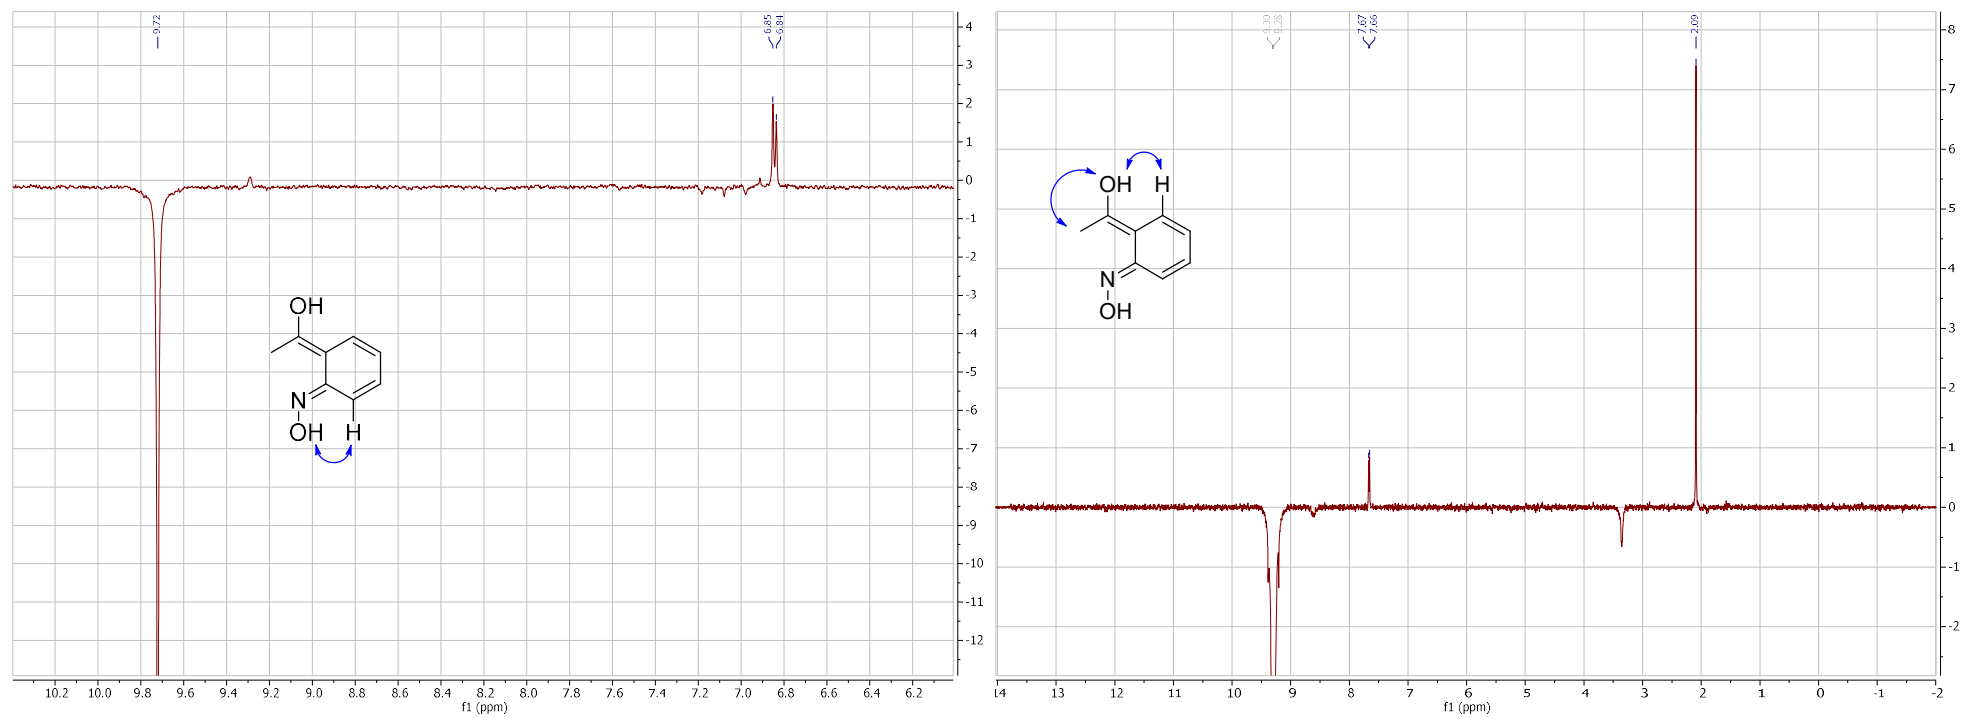

**Figure S3.** 1D-NOESY spectrum of Talarooxime 5 (DMSO- $d_6$ , 600 MHz).

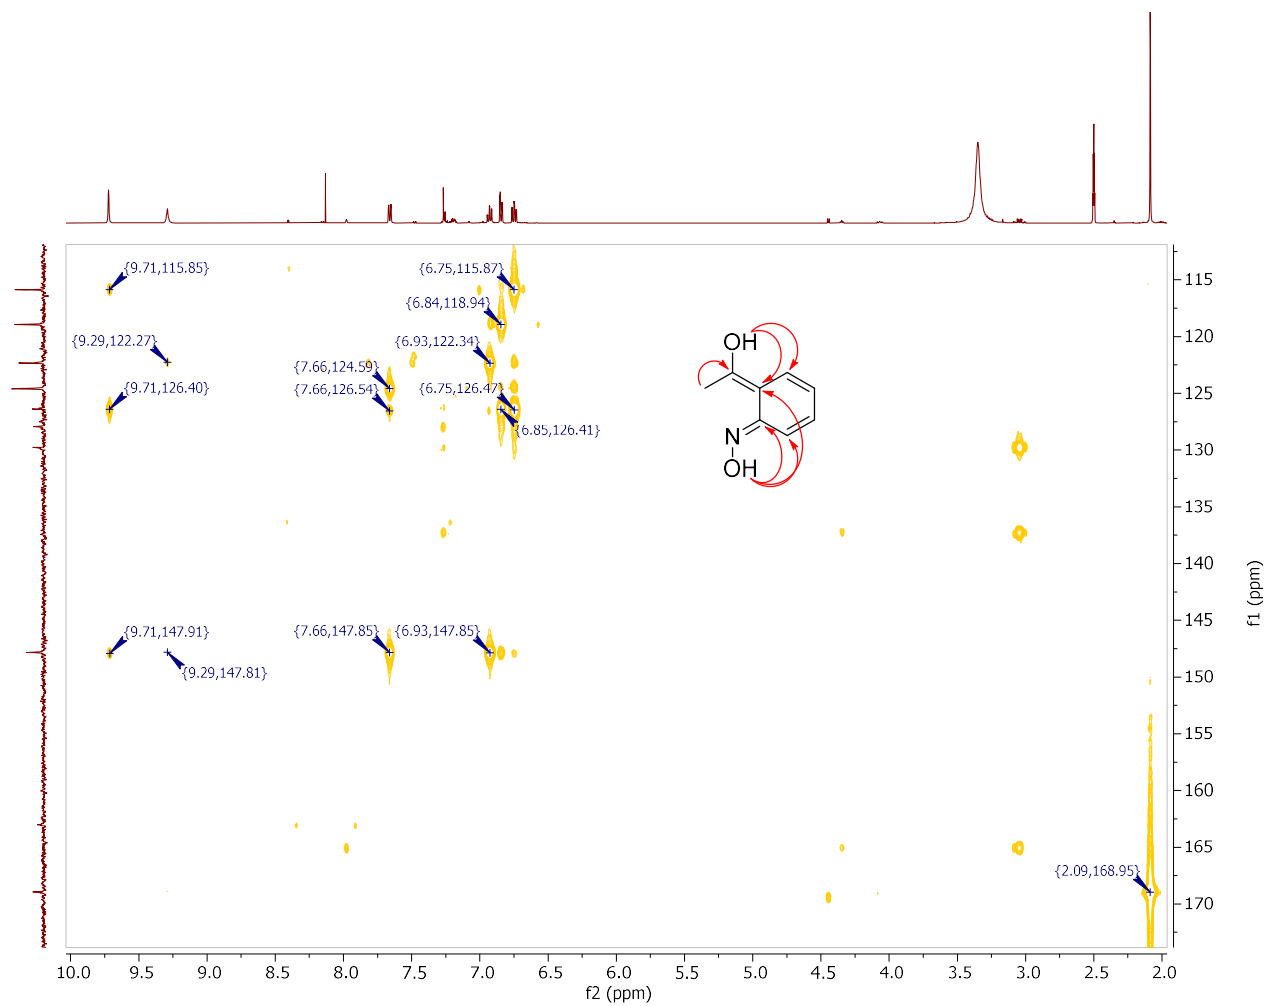

**Figure S4.** HMBC spectrum of Talarooxime 6 (DMSO- $d_6$ , 600 MHz).

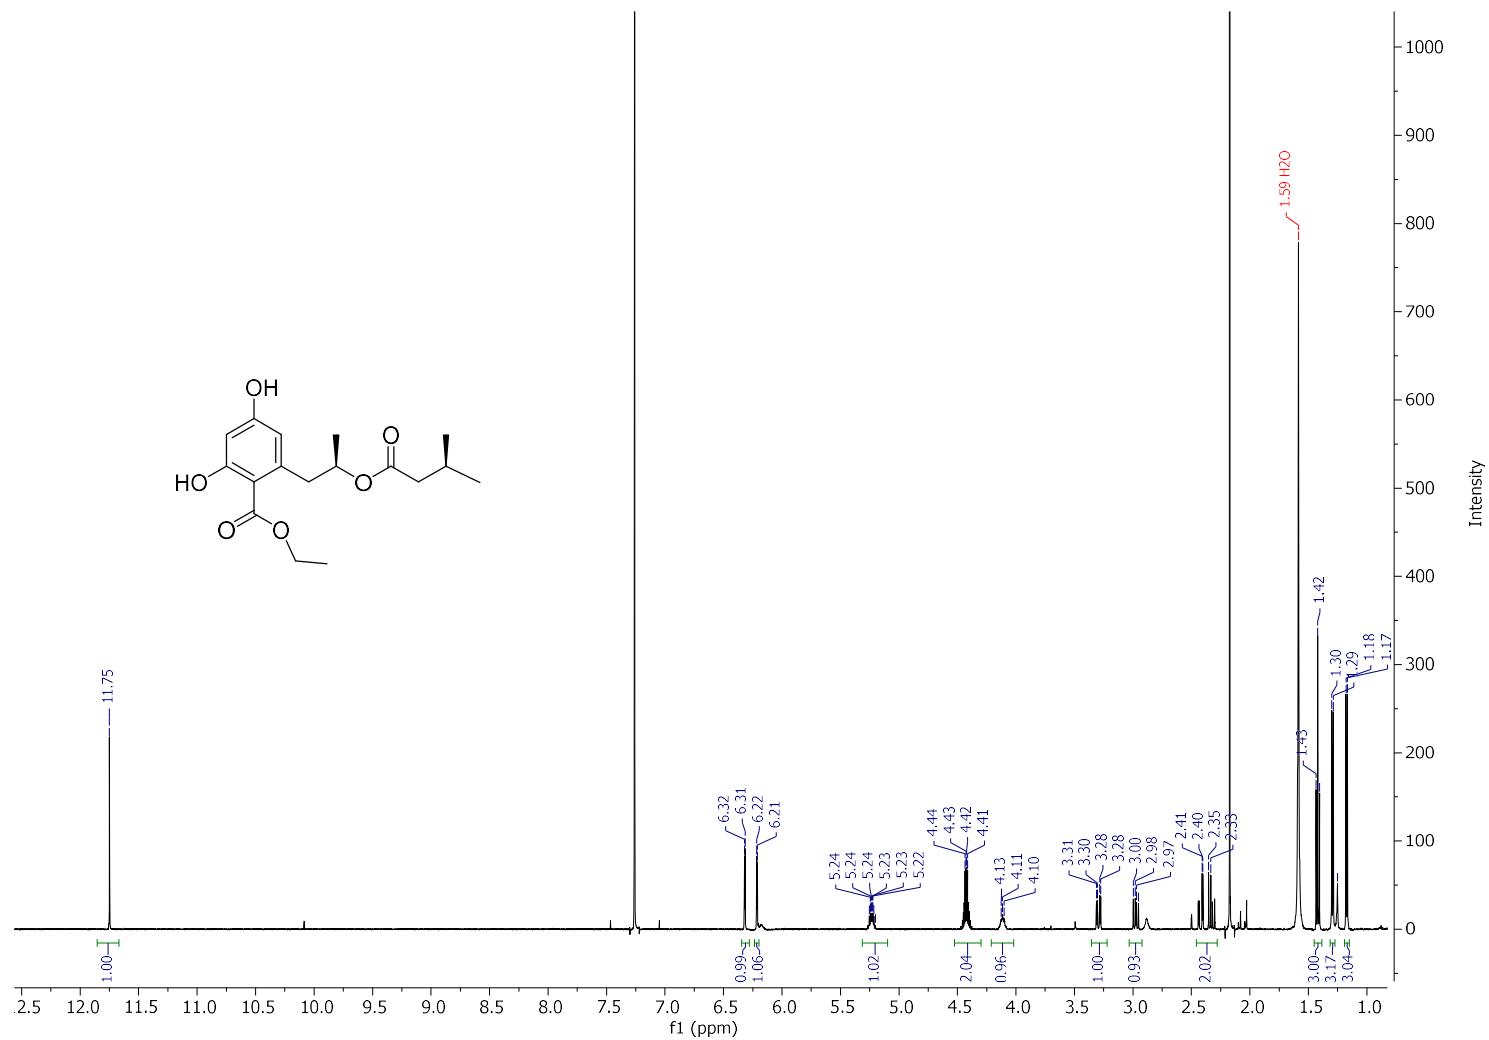

**Figure S5.** <sup>1</sup>H-NMR spectrum of Talapolyester G 2 (CDCl<sub>3</sub>, 600 MHz).

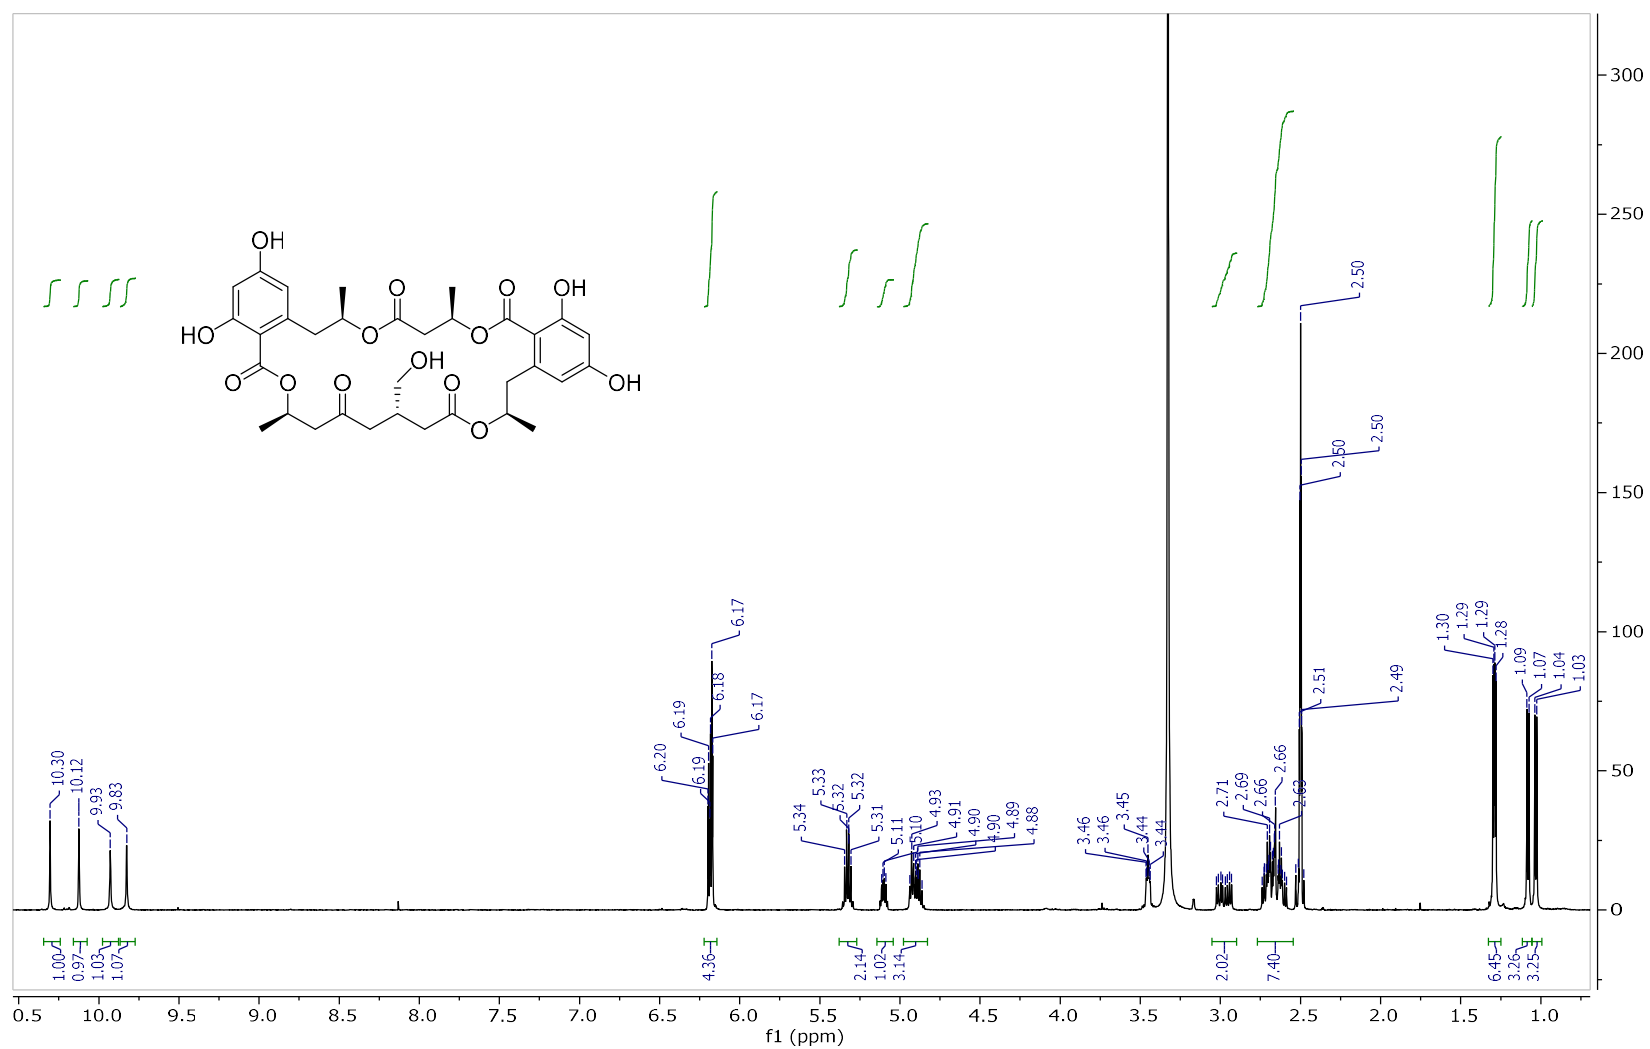

**Figure S6.**  $^1\text{H}$ -NMR spectrum of 15G256 $\alpha$  3 ( $\text{DMSO}-d_6$ , 600 MHz).

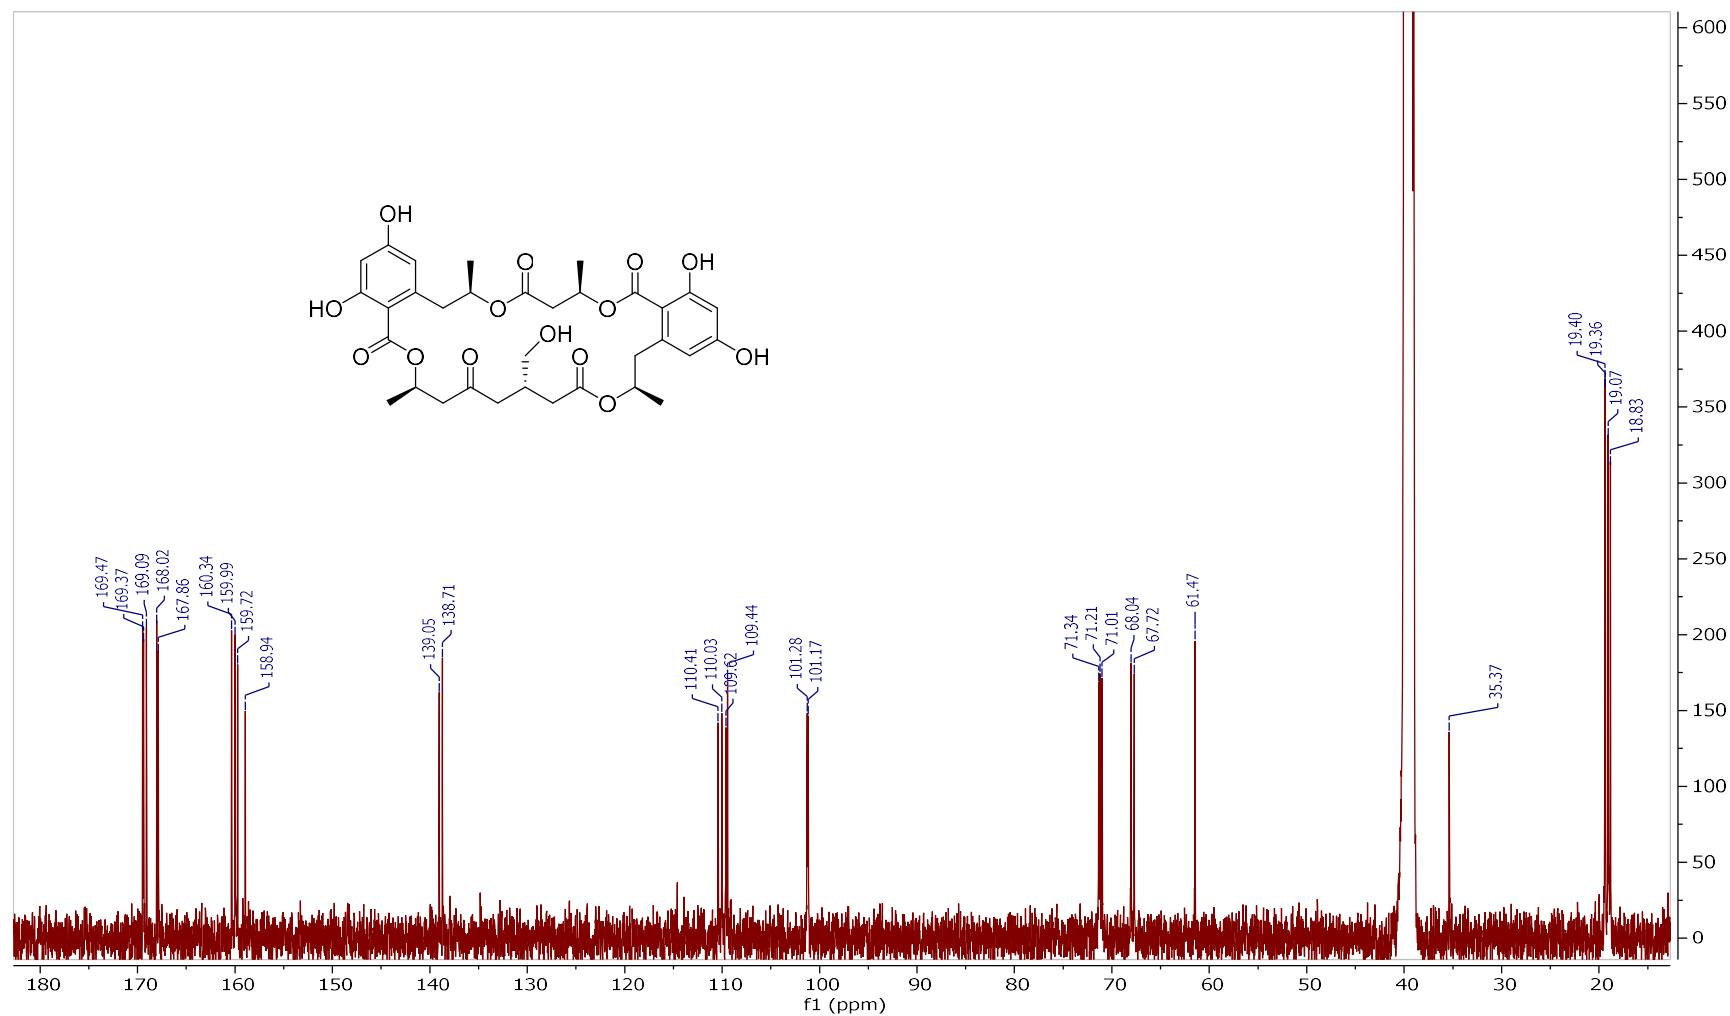

**Figure S7.**  $^{13}\text{C}$ -NMR spectrum of 15G256 $\alpha$  3 ( $\text{DMSO}-d_6$ , 150 MHz).

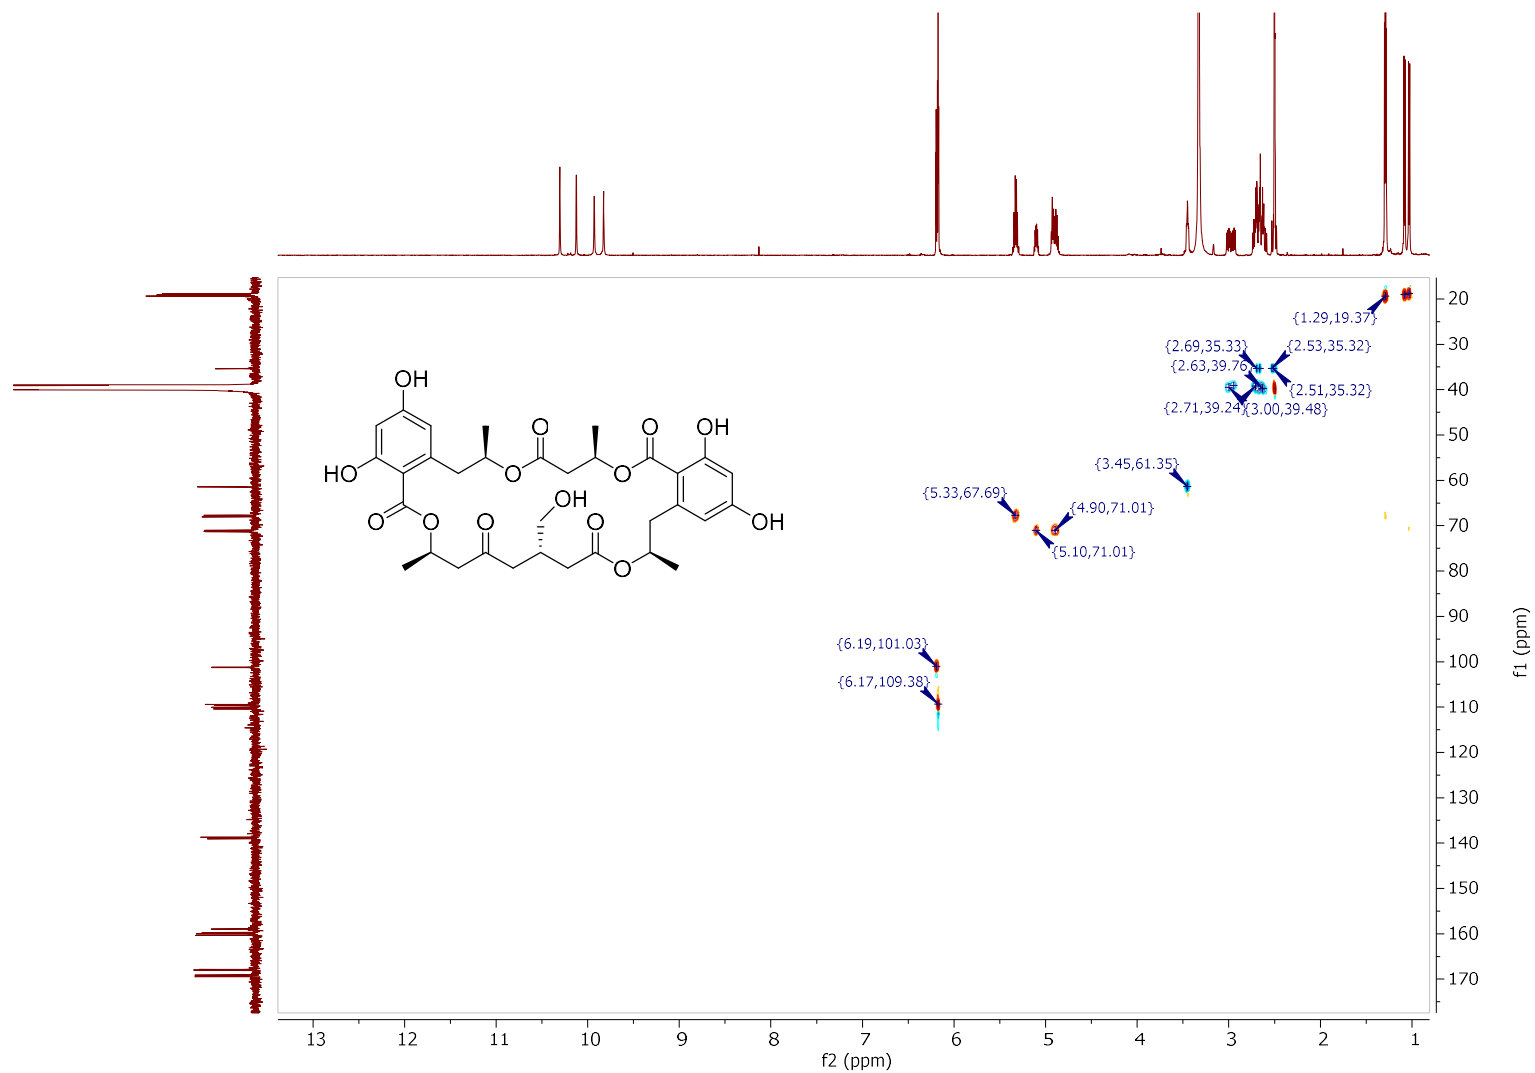

**Figure S8.** HSQC spectrum of 15G256 $\alpha$  3 (DMSO- $d_6$ , 600 MHz).



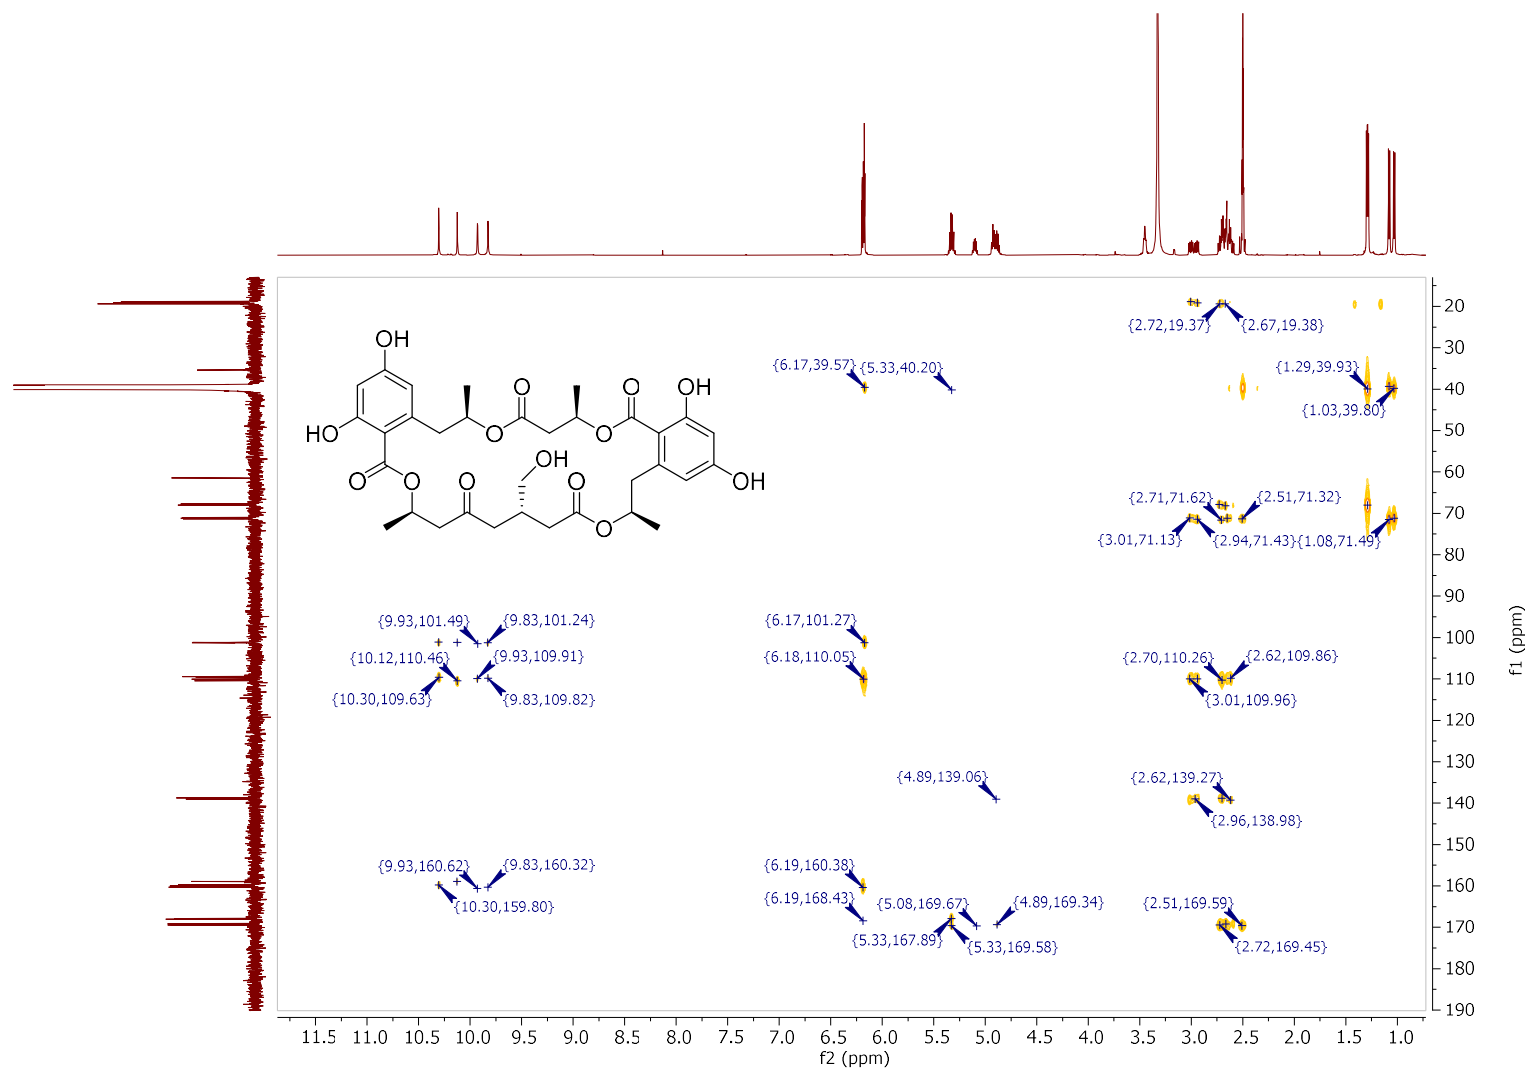

**Figure S9.** HMBC spectrum of 15G256α 3 (DMSO- $d_6$ , 600 MHz).

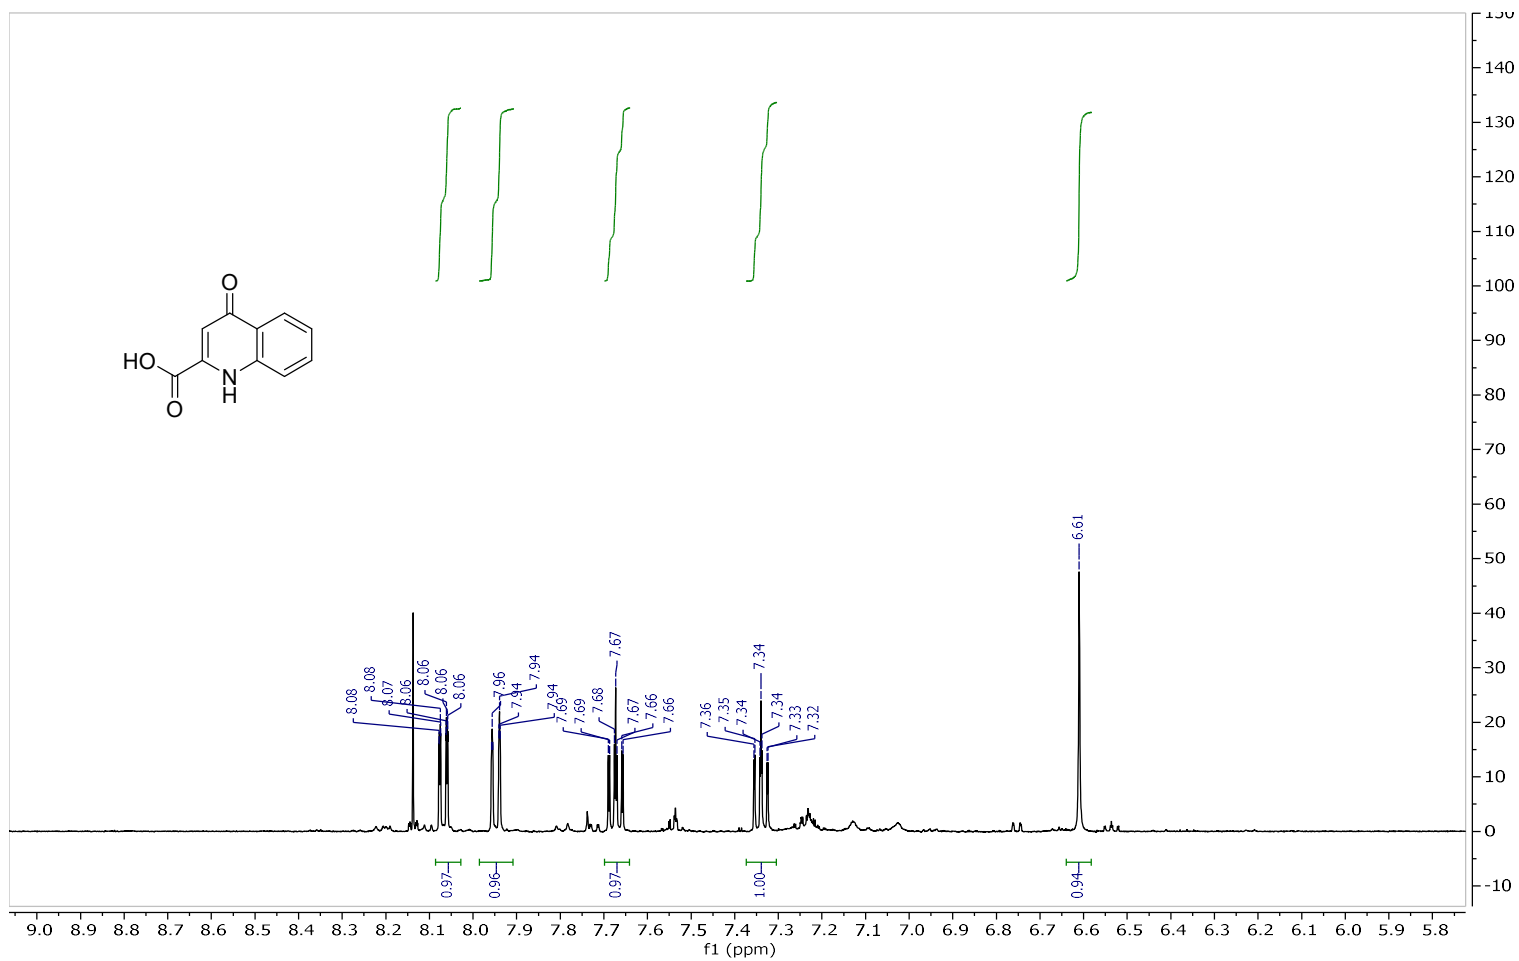

**Figure S10.** <sup>1</sup>H-NMR spectrum of **4** (DMSO-*d*<sub>6</sub>, 600 MHz).

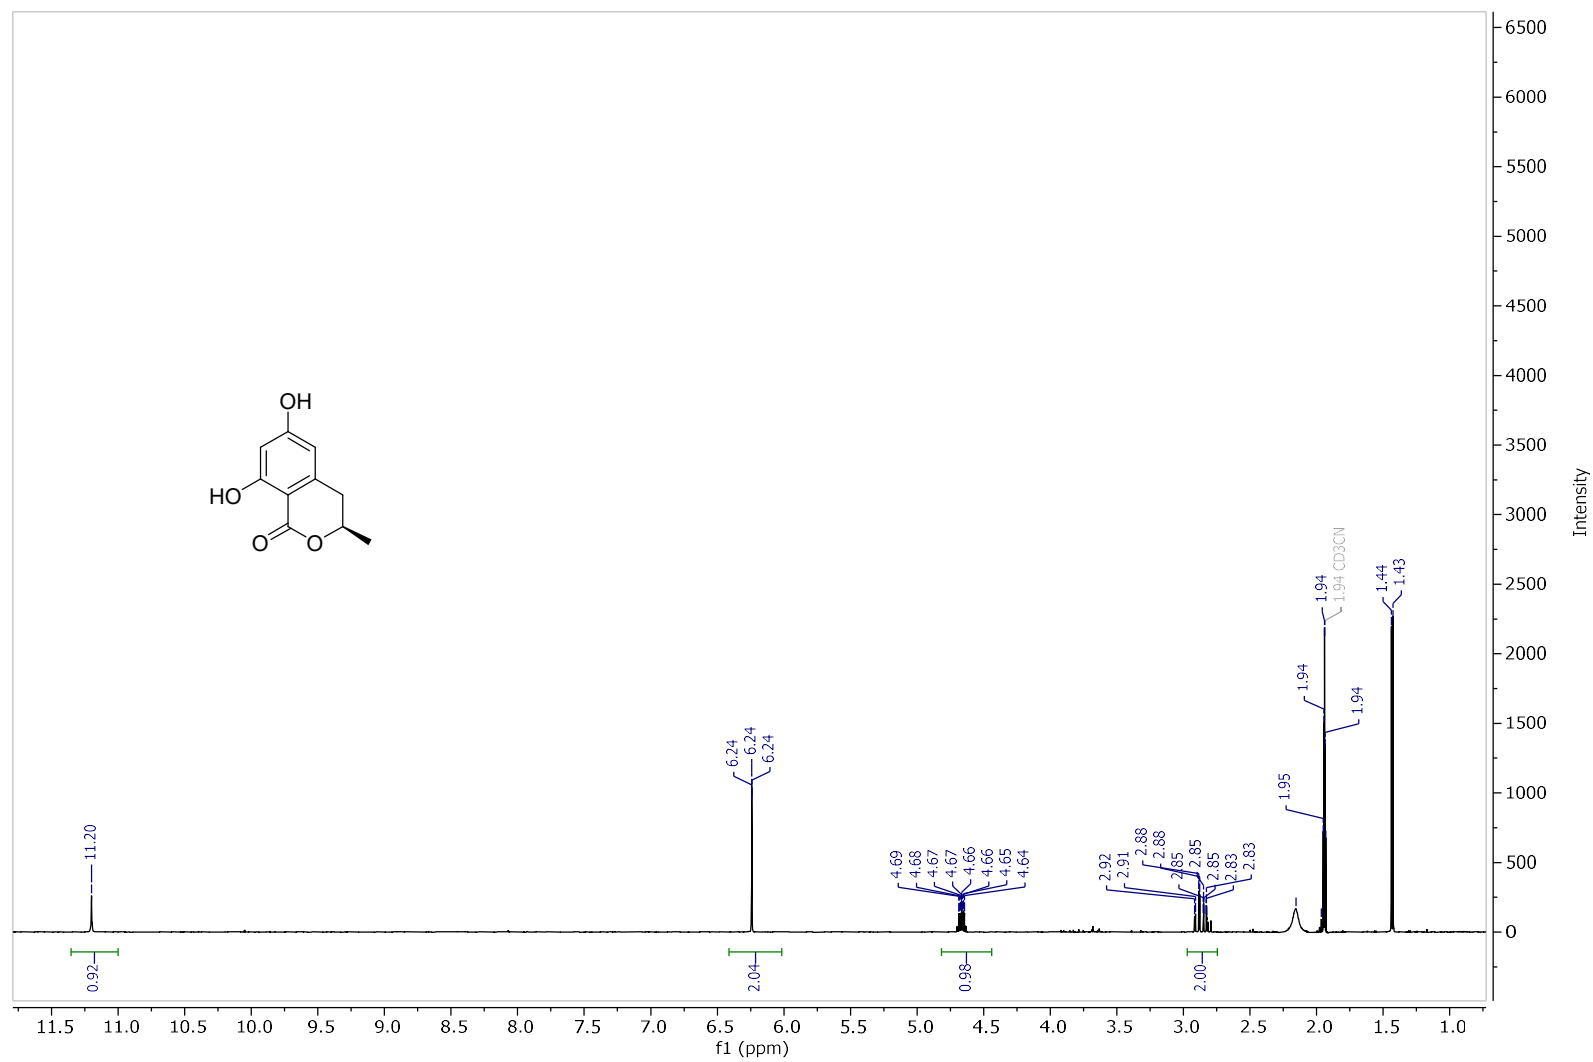

**Figure S11.**  $^1\text{H}$ -NMR spectrum of **6** ( $\text{CD}_3\text{CN}$ , 600 MHz).

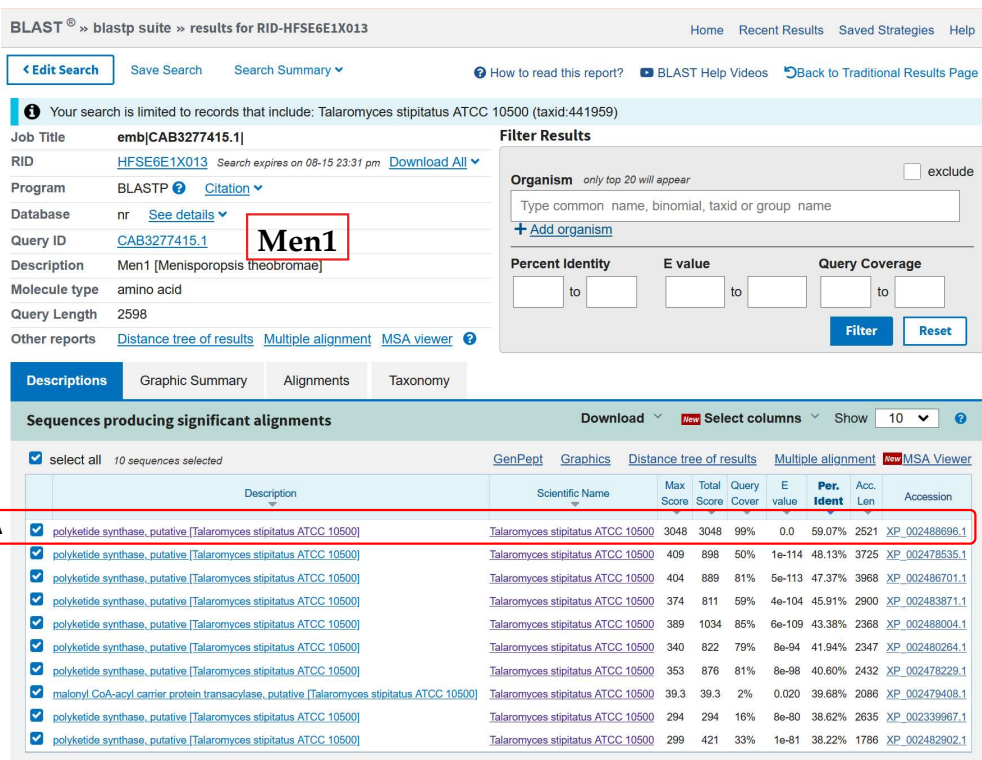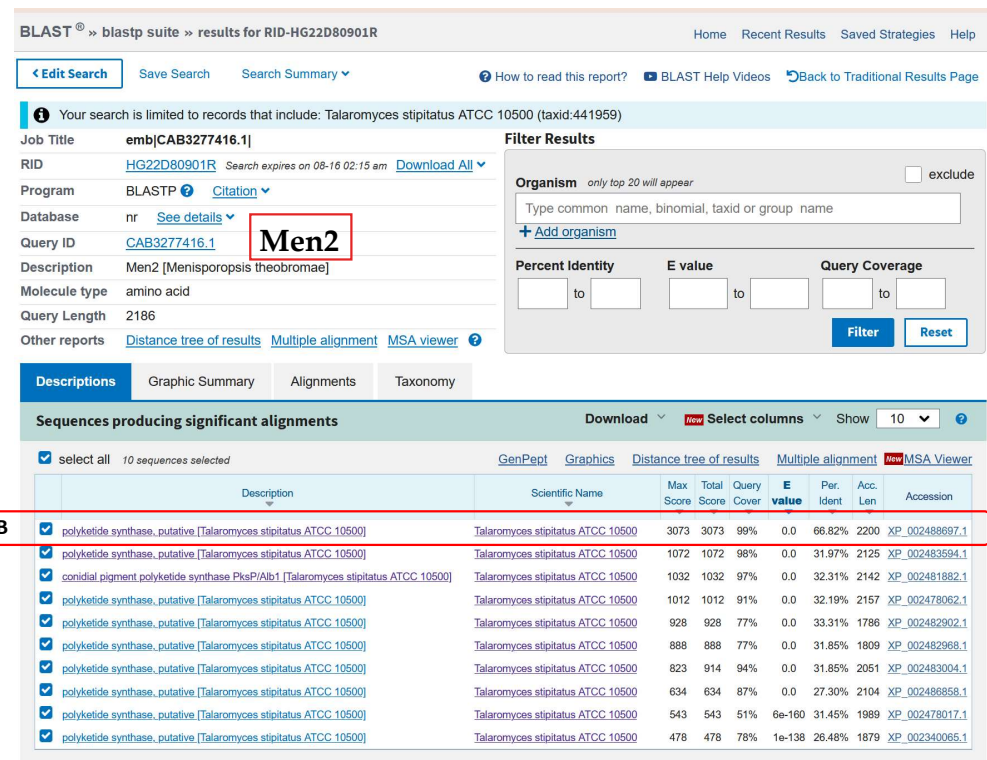

**Figure S12.** The result of protein Blast searches of Men1 (left) and Men2 (right) amino acid sequences against *Talaromyces stipitatus* protein database.

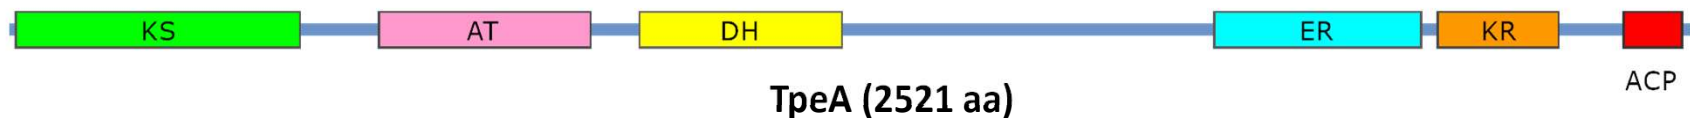

MENSYDDQSI~~AVIGLS~~CRFGDADNVERFWNLLREGQSAISTVPGNRWNSRRFQDDKNHSQNTSRTNRAHFLKEDVS~~AFDANFFSISKSEAVSMDPQQRLMLEVSYEAFENAGLAVES~~  
~~LAQSQMGCWSSFSQDWREMQFSDLQSVPKYAMSGMQPEMLANRVSYFFDLHGPSMALETACSGSLVGLHVACQSLRSGECDAALVGGANFLNPNMFLALSNQNFLAPDGLSKA~~  
~~FDASANGYGRGEGFAAVILKPVEKAIRDGDPIRAVIRATGTNQDGRTKGLTMPNGDAQETLIRSTYRSAGLELKD~~TAYFEAHGTGTQVGDFEELSAIARTVADARKREGLEELWVGS~~AKTNI~~  
~~GHLEATAGLAGVLKAILVLENGVIPPNLHFKNPNPRIPFQEYHIRVPTQEV~~TWNPDTIRRVSVNSFGFGGSNAHAIIDNGKQYLHQR~~RSKATLVNGTHAADDKELKPEVPQIFVINSSDQEG~~  
~~LGRQRSALRHYLANFGKEGRANS~~GWFRDLAFTLGKKRCRLPWRSFCTASTVLELSEALEATDFPKIRSGTAALRLAY~~VTGQGAQWAQMGLELFQFPTFKQSVVAADSHLKKLGCPWSV~~  
~~VEELQRSGAESNIHVS~~WYSQTLCTVLQVALVELLQSWGITPRSVVGHSSGEMAAFAIGALAREDAWKIAYWRGKLSELTERAPDLSGAMMAVGASHEQAQKWVEGLTRGKCVVACI  
~~N~~SPSSVTVSGDDAGLDELAAMLKEKEVFARKLKVTAYHSHHMKVVAEAYHDVLKDVEVRNVPTDGPQMFTSVSETLVNPSDLASHWVANLVSPVLSNTVAELARAKTPKDQATGS  
~~AVDLMLEIGPHAALRGPVTQILQAKGLRNVEYQSL~~SRGNAIQTTLAAVADLICRGVTADIDAVNNAHTPQGAGHKTMPANTLTTLPPYAWNHSRTFWTESRMLREAKAVNDSP~~SSFI~~  
~~GLPMPSFVANEHIWRGFLRLEHVPWVRHHKM~~QSAVLFPAGGFLAMAIEGASQFQ~~GKDNSRVAKGYKL~~R~~DV~~RIDSAVILTEESNIEHILQLRPHDTARSQQTDSYDGWWFEKISTSAGSD  
~~ESLKCNCYGLVTVEFEQLIHP~~SHASKASSTTVQQAFAFYERLESVGLYGP~~SFQA~~IKTILHSSGGQTEGEIEMDIDVNSTTPGGS~~DGRPYV~~VHPTTLEALFQMAYAAFDNQSDGVKKALLVT  
~~DIEELLLDASISHTPGARLQTSARSSRLGFREMLADVT~~VSPTASNAGGISVRGLT~~CVEMPSTAGVNSDVGITGREGYDSMLS~~KFVWKPALNLLSATEREHLIAATKVTD~~AETE~~ILAREAAD  
~~FQNVKSALQASQRGKTGSLKLRNALKWISQELPDAKVF~~GKALENVSQDGGGAGPTGP~~IVD~~VLSTPDPVLLSGYGSTEF~~LAALPGVKVSLQKMYQLVS~~IMAHENPD~~LA~~VLEIGSGSSG  
~~EEDTSIFSTTDIPTTIKYTRAVATPEILRN~~LQEFSPAGPIPRFTVLDLEQDLADQGIDLASFDIIIGNNVLSNSRNVENVLRRTKSLLRDEGNMCFVELTKPSSRAVPVLGVVCDWWKRGDDG  
~~LRRPLSSDSIKDILTEQGFTLDFLSPDFV~~DPAIQQSSLVFASSSAENLPTASATDDADDEEIYILISPELKSPDAVVQNVASSFQHSQIVTWGAGVDFKGYIISLLELYDPFINHLTEEDFDILKKLV  
~~TQASSLLWVTGIPEPHASTILGFARVVRFEIPSLDFRVL~~TLDPATIEDAKKNSIHISQVQRSKSPDKEYKELDSIVHIPRVTVDASLNHQISNLCSEAIESKPLGSLERPQKLCIRNP~~GMLNTLCF~~  
~~QADNVSENELQDDEVEVRVMASGLNSKDV~~MVALGHITDTHLGLEASGV~~VL~~RVGASVTHLQLGDKV~~VML~~ANGAHR~~TT~~LRGKA~~AVCQ~~KIPQDMTYEEAAGFPFAYCTAYY~~TLLH~~VLRAQ  
~~SGQSVLIHAAAGAVGQALVRLAQHLGLEV~~TTAESADDRA~~FVQELLGLFPDRIYHPQDKGLVQHV~~MRITGDVGVD~~FIVNPLSVEE~~IADSLNCLADFGTFVEMGMENDSRHSTLNTRLFRR  
~~DTTFVAVNLQRVLELRPKLIGELQKALGLFQDGQVKS~~VSPSNVYPVSEAEAAIQMFQDN~~RHHGKITLSYSS~~EDFVSVLQNPKDSLKSPDNTYLIAGGLGGIGRSLATLLVDCGARHIAMVS  
~~RSGVTSVEQQQLIDNLSERGAKIGVYKCSIGDANALGRALTQCASEMPPIKGI~~HS~~AVVFRDAVLHN~~MTYKQWDEL~~LDGKL~~RGSWN~~LHAL~~TTSYNLDFFLCIGSFMAIIGGISQSNYAAGSA  
~~FQDGLAHLRQSQGLPAVTIDLGIVKGF~~GAVEEQGAVGHTLEWREPFVSEPEVHALIKGALLGQRGNWALD~~VPAQ~~MINSIPTGGMVRSSGVSQPYFDDPRFSIMAKIGMDSENSDTQ  
~~ASVSLKELLADAESSDDAVLFVTGAVISKVAKLMQVA~~EEEEIDTGKSLHAYGV~~DSLVAVEYVSWAKKEVSADITVFDVMASKPIMS~~FARDLVGKGKWGAAPACKS

**Figure S13.** The amino acid sequence and domains of TpeA which were identified using SMART as follows: KS (green), AT (pink), DH (yellow), ER (cyan), KR (orange) and ACP (red).

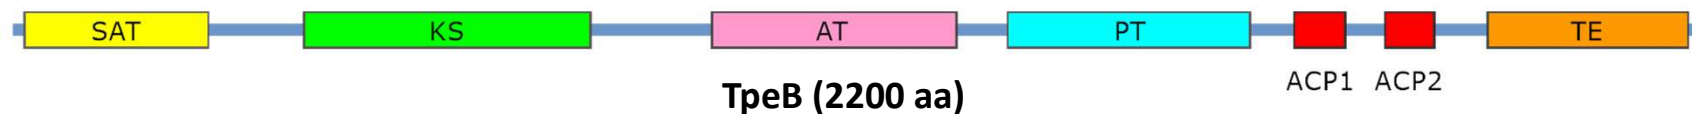

MGSLSAARESAQRITFFGDQTVDTLLCIKDLANRSHQLPILRRYLREAADKLQLLLSQIELGDYECYRNFETIVELAEIYSKQDGTYEPIGCALWTISQFADYLSRSETDPSILTLS  
 DSAAQPTYVVGVCGLLLGAAAATARDINELLDIGRKLVDVSFNLGVAQWKRAMDIEGKPGRWAVAIVNVPPKQIRNIITAFNEDMAIPKHRQFYISFLAKGWAAISGPPS  
 IFPELWEYSSTLSSASKMDLPLGTPAHAAHLRSLNIEELIGSGSVLDLPVRQDRLVISTSTCKPFESQTFGSLSSSLHDITGETLHIAGVNDYVASCLSRETLVQVSSFGPTSQIG  
 SFKKALEDGLKVDLDLSPESKTPNLLKNPDARDGSGNMIAIVGQSVRLPGSDDVKTFFWENLKAGQTFESEIPSRFDLQNYDDTTGAKKSSVTRFGHFDRPGLFDCRLF  
 NVSPREAKQMDPIQRLLLMCSYEALQTAGYSPDSSLSTNMRVATYFGQSGDDWRQGRASQDVDIYIPGTIRSFAPGKLNHYHKWGGGNYSDSACAASTTSVIMAC  
 NALLGRECDMALAGGGQLHLEPENYAGLSRAGFLSKTTGGCKTFREDADGYCRGEGIGVVLRLEDALADNDNVLAVVRGADRNYSWDASSITHPSANAQATVIQRV  
 LRNTGVEPADIGFVEMHGTGTAGDSVEMKTVTTVFGSRPKDNPLYIGAVKANFGHGEAAAGITSLKAVQMLGQKTIPIRQPGFPGPKDPTFDHLDAMNIRIPDSSFPFP  
 TPTRPFSQDGMRLVNNFDASGGNNCVLLEEAPDKNVSIQIDPRQYYTVAISARTTKSLQKNMERLSDYLVKHPDTPVADVAYTSTARRIHEDLKRSYTVDESTESLVGLLQ  
 ADLKKDLTGIRPATPRSVVFAFTGQGSQYSGMTKQLFETCTPFRESVQSLHDLAVWQDFPSFLNLTDDVTDEISAPIQTQLAIVVLEMSLANLWKSXWVEPDLVIGYSLG  
 EYVALYVSGVLSAHDVFLVGNRAQLMDERCEIGSYSMLAVQASPEDLEEPLKAYPTSNVACRGAPRSTTVSGPSEDIKLAHELKEKSISGTLNVPYGFHCAQVDPILED  
 RDLLDRVPFSKPRIPVASSLDGVIIVTDDVFSYSMVVRQTRPVAFVSALKAIETSHLVDNTSLWVEIGPKRVLSFIKATLAVDHRLLHSVDEKASNWRTIATAITACWQG  
 GVSIKWQNFHRQFTKHLRLVDLPTYAFDLKDYWIEPAAPIVQQRSAAEPLRQVAVPAVPGFPTASLQRVREERIQQDAAVTFESTLSHPDLMGLIRGHQVNGVDLFPAS  
 GWWDMAYTAAKYIHHRIQPSRGAAPGLSMLDCSITHPLMPSASEDQQKLVIIVAKKQAGSSVVEVSFKSQEKSVEQDHGCKIRFESKADWEAERSAHFIKAANKNV  
 VTNATRPDGNHKLKPKVVYTLFSNFVNYSGDFKGIQQVYLNADFQREVADVLPAGMYNFNLNPNYWSDALIHACGFMHSDPDLPTQDCFLNGFEELRFLMDDL  
 PGVPYTSYVFMHDTNSQEVPAKRTNRVTGDIYIFQGEKIVGTQGVVFQRLTKRILTTILGKSQDHHNSNEVRNGNATTTHTNPPAHATTQSFAPPGIKPAVAFSSAPATV  
 GEETAEAVIAKILTKGANRASLESTTLGEIGLDSLEWIELVGVFRSALDIEVPASFFFEYPKVLRLRQAI AELPLEGEKEESGSSSPDSPYGMILPATGRFTPITASRSTHNSDG  
 PANYANIVLDIVLSQTGFDDKDDVLPSTRFDDMGLDSLCTMEVVSLSVREQTGLDLPASFFHHHPTVADVRKNLGPNTEDKSKDSVKASASIAVSEPATELVVVHHPGNPAP  
 ESLPIIDEDLKDYHCDFFLMQGSDDSAEIPMFLLPDGTGYPAVLLKLPPVFKGDNPLFTCKSPLLHRAEGREVACTIEGLALSIAEAIARRTRPHGPYLLAGYSLGAAYAYEVAKIL  
 ADAGEIVQGLLFVDFNMAASVGLHRERKPVPTNLNVGVMEQVGWMNGIHNDKFNHIPPAPPKIKFHALSVFKSLTRYFPKPMTPSQRPNTYALWAGAGMEDLLG  
 PSNAGFLPEFGIIDWQMGSRRENNGPAGWENFIGGPVRCATVPCDHLSIMMSTDWVGTTANIIKDLEDALESNPGTP

**Figure S14.** The amino acid sequence and domains of TpeB which were identified using SMART as follows: SAT (yellow), KS (green), AT (pink), PT (cyan), ACP1 (red), ACP2 (red) and TE (orange).

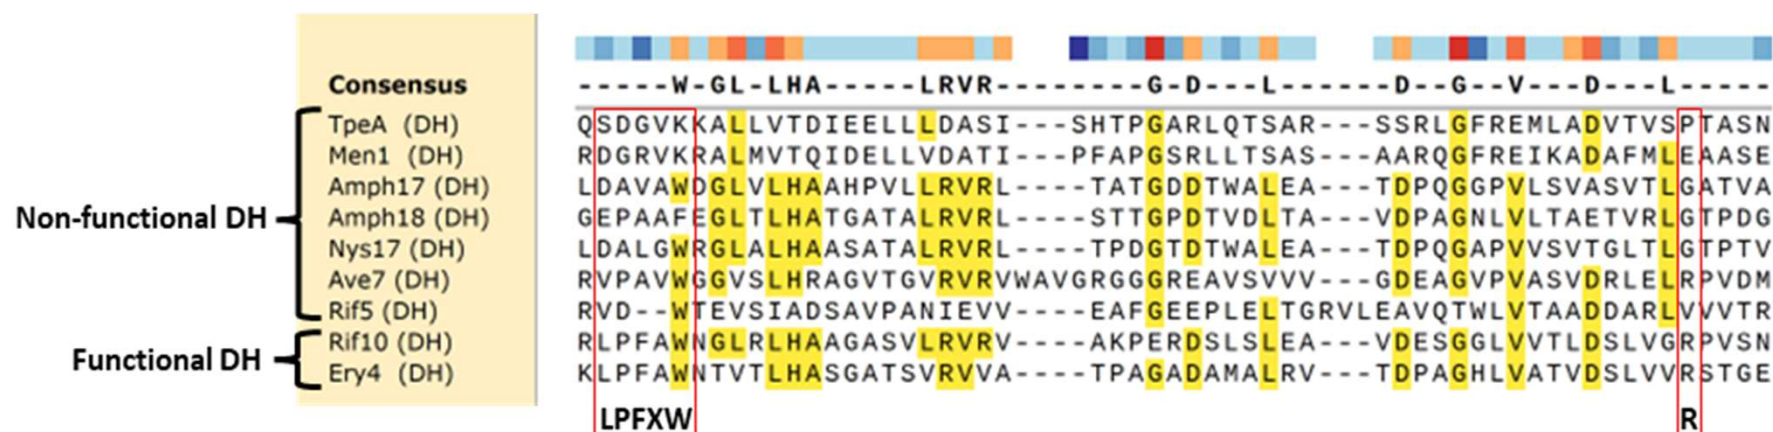

**Figure S15 :** Protein sequence alignment of the predicted site in DH domains for ACP interaction of TpeA and other functional and nonfunctional DH domains including Men1 and modular HR-PKs such as Amph17 (AJE44526) and Amph18 (AJE39059) from *Streptomyces nodosus*, Nys17 (AAF71767) from *Streptomyces noursei* ATCC 11455, Ave7 (BAA84478) from *Streptomyces avermitilis*, Rif5 (AAC01711) and Rif10 (AEK39124) from *Amycolatopsis mediterranei* S699 and finally Ery4 (CAM00064) from *Saccharopolyspora erythraea* NRRL 2338.

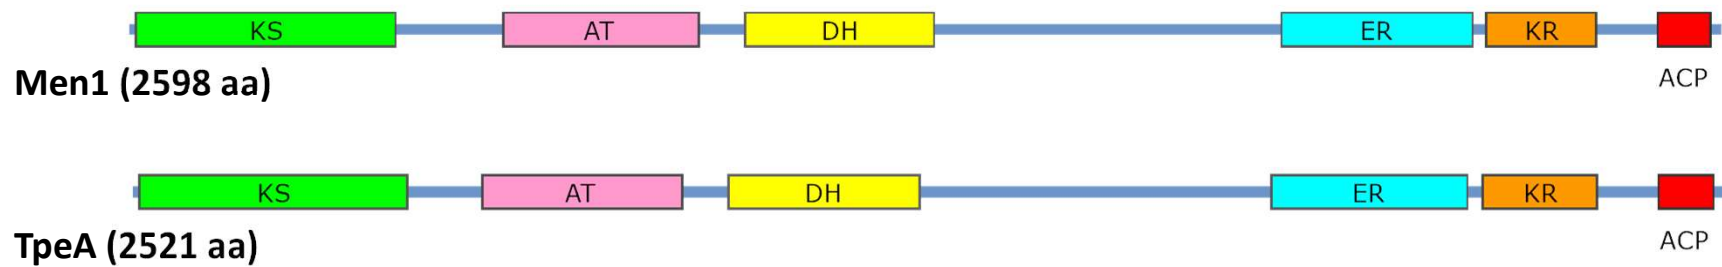

**Table S1.** The similarity of TpeA domains to their counterparts in Men1.

| <b>Domains</b> | <b>Size (aa)</b> | <b>Similarity to Men1 domains</b> | <b>E-value</b> |
|----------------|------------------|-----------------------------------|----------------|
| KS             | 428              | 79.72%                            | 0.0            |
| AT             | 318              | 76.49%                            | 5e-170         |
| DH             | 302              | 50.00%                            | 2e-89          |
| ER             | 313              | 42.54%                            | 2e-85          |
| KR             | 181              | 77.90%                            | 2e-93          |
| ACP            | 85               | 70.59%                            | 7e-32          |



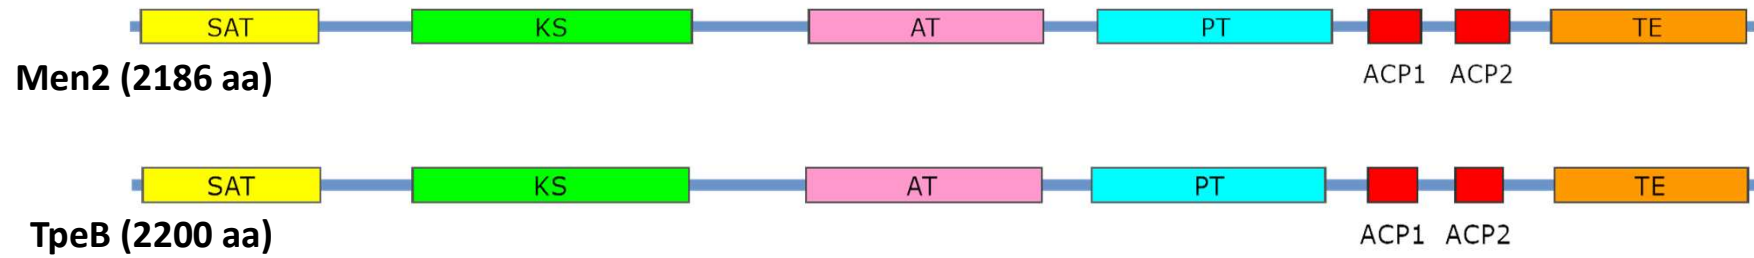

**Table S2.** The similarity of TpeB domains to their counterparts in Men2.

| <b>Domains</b> | <b>Size (aa)</b> | <b>Similarity to Men2 domains</b> | <b>E-value</b> |
|----------------|------------------|-----------------------------------|----------------|
| SAT            | 241              | 73.75%                            | 7e-113         |
| KS             | 376              | 79.79%                            | 0.0            |
| AT             | 320              | 68.75%                            | 4e-159         |
| PT             | 318              | 58.62%                            | 5e-134         |
| ACP1           | 67               | 64.18%                            | 3e-27          |
| ACP2           | 65               | 83.08%                            | 8e-36          |
| TE             | 262              | 78.16%                            | 4e-132         |
